# Supplementary material for: Dynamic gene regulation by nuclear colony-stimulating factor 1 receptor in human monocytes and macrophages
Source: PubMed Central journal article supplement (PMC6486619; doi:10.1038/s41467-019-09970-9), 2019-04-26
Supplement: 41467_2019_9970_MOESM1_ESM.pdf [file 41467_2019_9970_MOESM1_ESM.pdf]

## **Supplementary informations**

### **Dynamic gene regulation by nuclear colony-stimulating factor 1 receptor in human monocytes and macrophages**

Bencheikh L et al.

Laura Bencheikh *et al*, Supplementary Figure 1

**A**

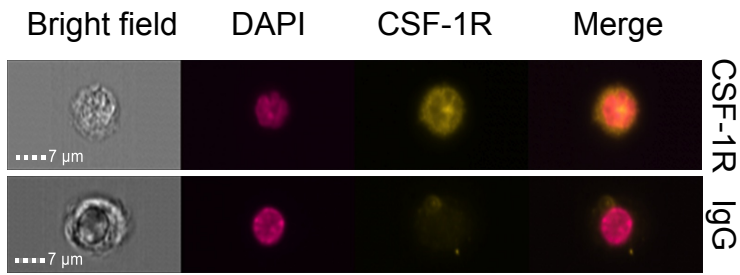

**B**

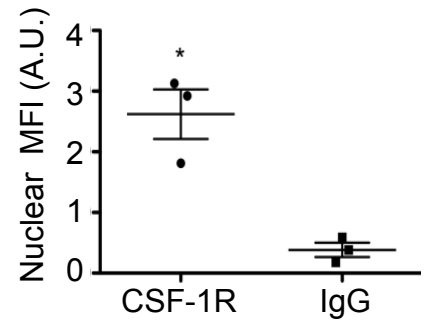

**C**

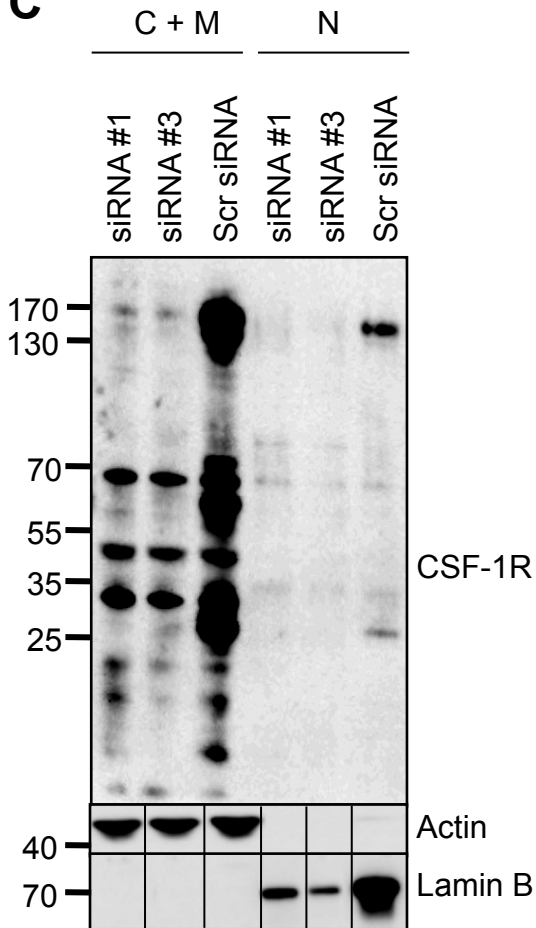

**D**

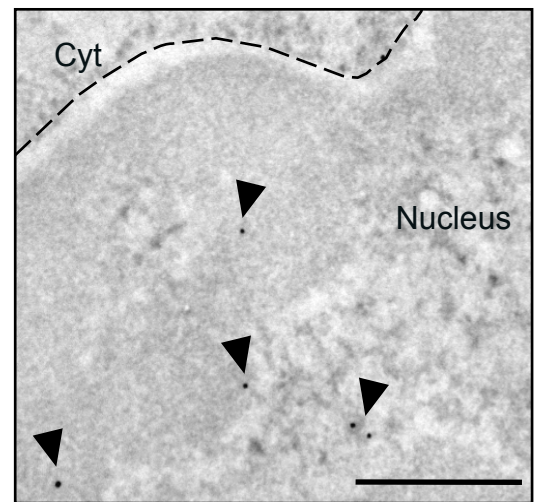

**E**

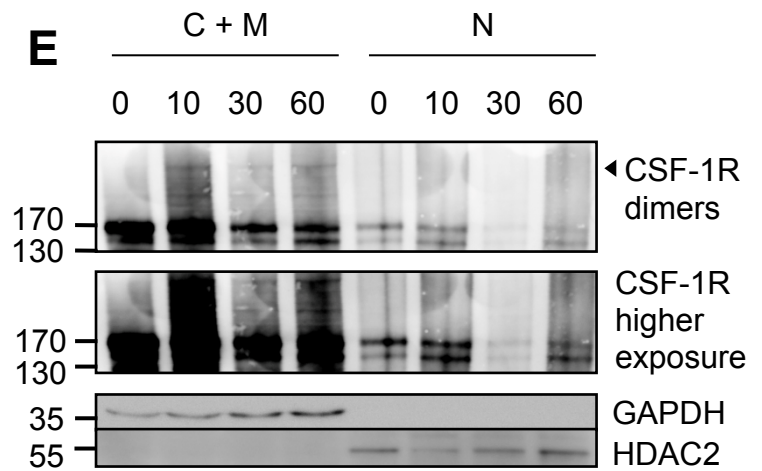

**Supplementary Figure 1: A fraction of CSF-1R is located in the nucleus of human monocytes.**

**A,B.** Monocytes were fixed and stained for CSF-1R (anti-Cter sc-692) or a non-relevant antibody (IgG) and Dapi, followed by imaging flow cytometry (Amnis); **A.** representative image (DAPI in purple and CSF-1R in yellow, scale : 7 $\mu$ m); **B.** quantification of nuclear CSF-1R (mean +/- SEM of 3 independent experiments, MFI : mean fluorescence intensity, A.U. : arbitrary units, \*P<0.05). **C.** Monocytes were transfected with CSF-1R specific (#1 and 3) or control (Co) siRNAs; 24 hours later, cytoplasmic plus membrane (C+M) and nuclear (N) proteins were extracted and separated for immunoblotting with CSF-1R, Lamin B (nucleus marker) and actin (cytoplasmic marker) antibodies (n = 1). **D.** Electron microscopy analysis of monocytes stained with an anti-CSF-1R Nter (sc-365719) antibody (scale: 500nm, n = 1). **E.** Monocytes were fractionated into cytoplasmic plus membrane (C+M) and nucleus (N) before and after CSF-1 stimulation (100ng/mL for indicated times in minutes), and proteins extracted from these fractions in the absence of DTT and boiling were analyzed by immunoblotting for CSF1-R, histone deacetylase 2 (HDAC2, nuclear protein) and GAPDH (cytoplasmic protein) (n = 2). Two exposures of CSF-1R blot are shown.

Laura Bencheikh *et al*, Supplementary Figure 2

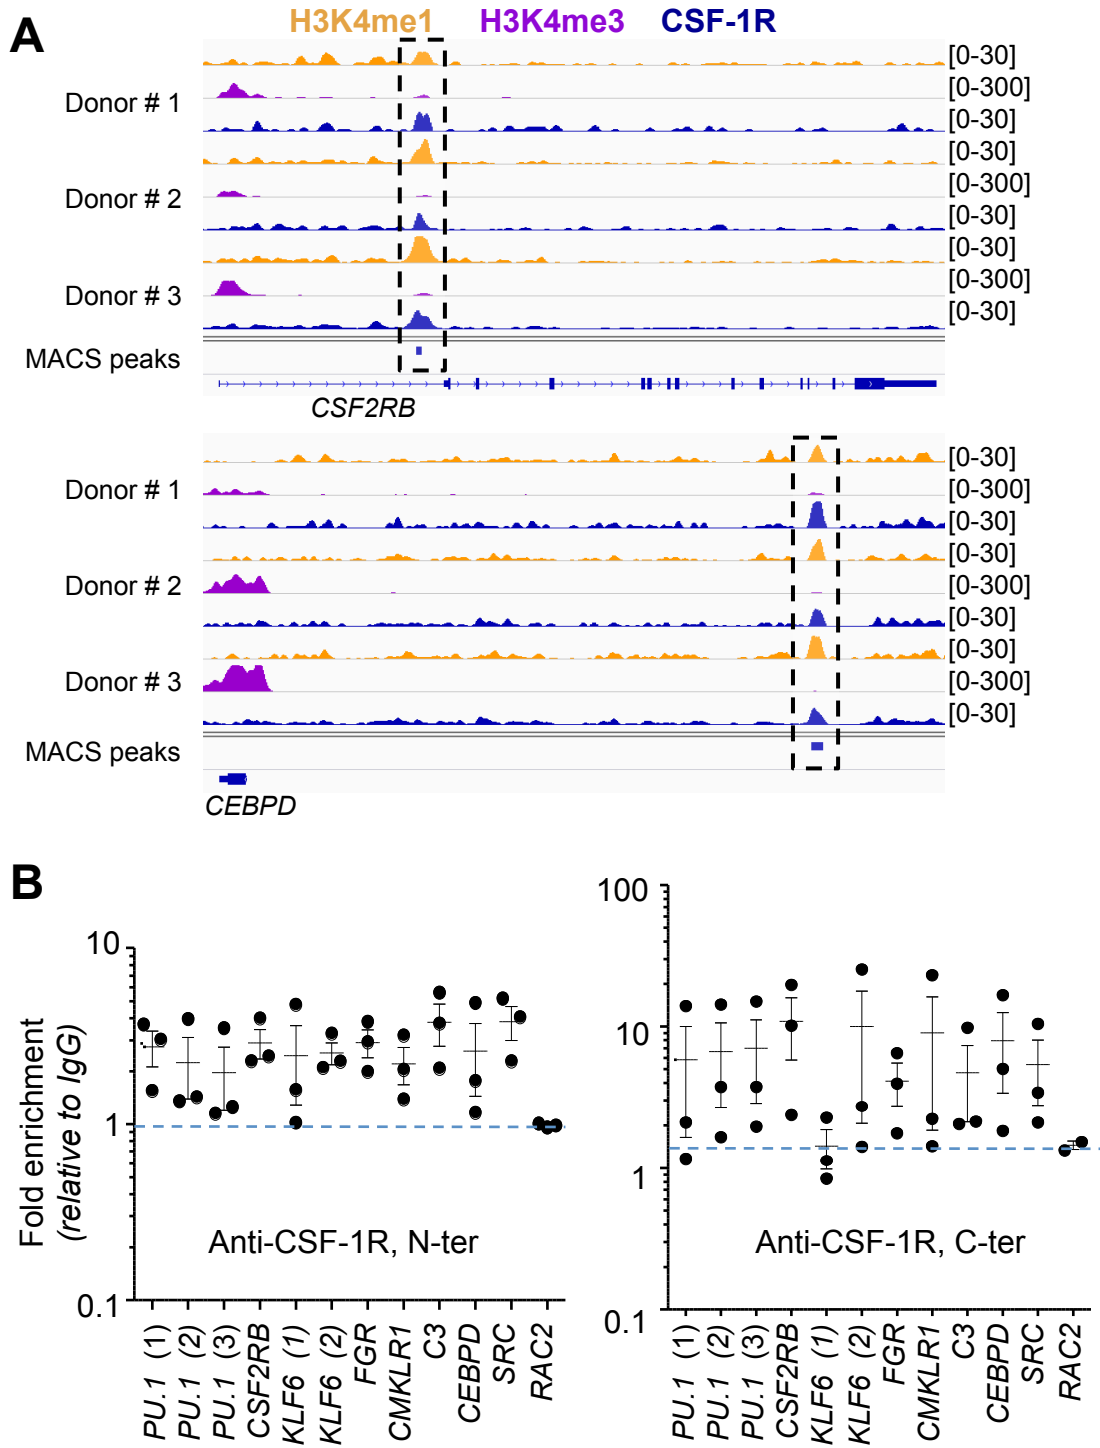

**Supplementary Figure 2: CSF-1R is recruited to the chromatin in human monocyte nucleus.**

**A.** Peak calling for CSF-1R (blue), H3K4me1 (orange) and H3K4me3 (purple) ChIP-seq on *CSFR2B* and *CEBPD* genes in the three healthy donor monocytes (TSS: transcription starting site, TTS: transcription termination site). **B.** Chromatin was immunoprecipitated from monocytes with the anti-N-ter (sc-46662) (left panel) or the anti-C-ter (sc-692) (right panel) CSF-1R antibody or control IgG followed by qPCR directed against *PU.1* [*promoter* (-1739), *intron 4.1* (20202), *intron 4.2* (21399)], *CSF2RB* (7581), *KLF6* (1) (-17610), *KLF6* (2) (-23783), *FGR* (1599), *CMKLR1* (33519), *C3*(3024), *CEBPD* (-25567) and *SRC* (72944) genes, using *RAC2* as a control whose level is figured as a hatched blue bar (normalization to IgG, mean +/- SEM of 3 independent experiments). Results are normalized to IgG (mean +/- SEM of 3 independent experiments).

Laura Bencheikh *et al*, Supplementary Figure 3

**A** EGR1 / CSF-1R common peaks

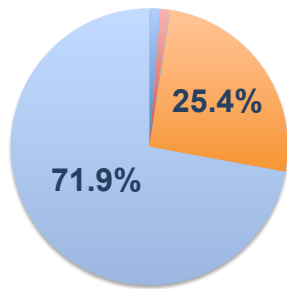

- Promoter-TSS
- Downstream
- 5'UTR
- 3'UTR
- Coding exons
- Introns
- Distal intergenic

**B** H3K4me1 H3K4me3 CSF-1R EGR1

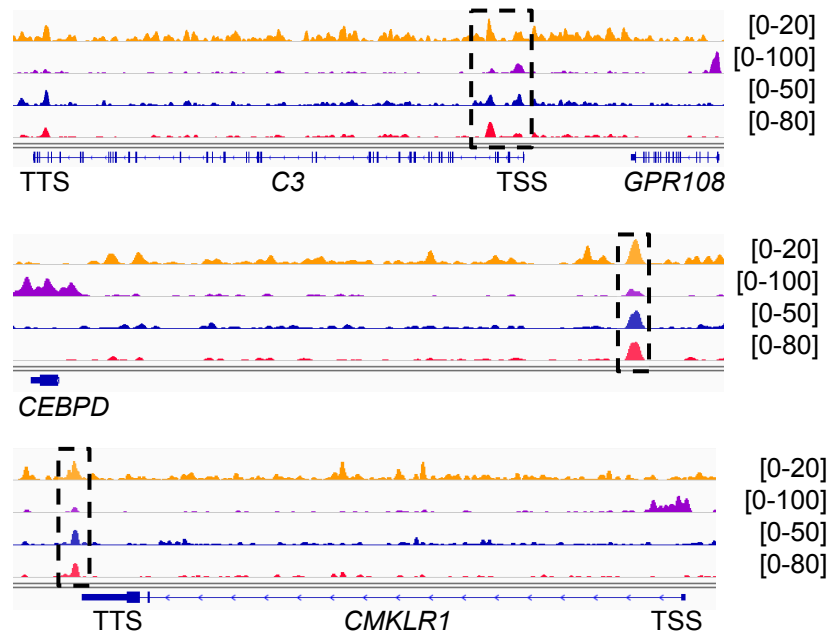

**C**

| Motif | Transcription factor | Target sequence with motif | P value            |
|-------|----------------------|----------------------------|--------------------|
|       | EGR2                 | 22.9%                      | 1e <sup>-194</sup> |
|       | EGR1                 | 42.9%                      | 1e <sup>-167</sup> |
|       | HOXA1                | 24.8%                      | 1e <sup>-85</sup>  |
|       | HOXA2                | 14.9%                      | 1e <sup>-85</sup>  |

**Supplementary Figure 3: CSF-1R interacts with EGR1 to down-regulate gene expression.**

**A.** Repartition of CSF-1R peaks detected on EGR1 motif and common to three healthy donors, to be compared to genome organization shown on Figure 3b. **B.** Peak calling of ChIP-Seq experiments performed with H3K4me1 (orange), H3K4me3 (purple), EGR1 (orange), and CSF-1R (dark blue) antibodies on *C3*, *CEBPD* and *CMKLR1* genes in human monocytes of healthy donors (TSS, transcription starting site; TTS, transcription termination site). **C.** Motif analysis of EGR1 peaks common to two healthy donors.

Laura Bencheikh *et al*, Supplementary Figure 4

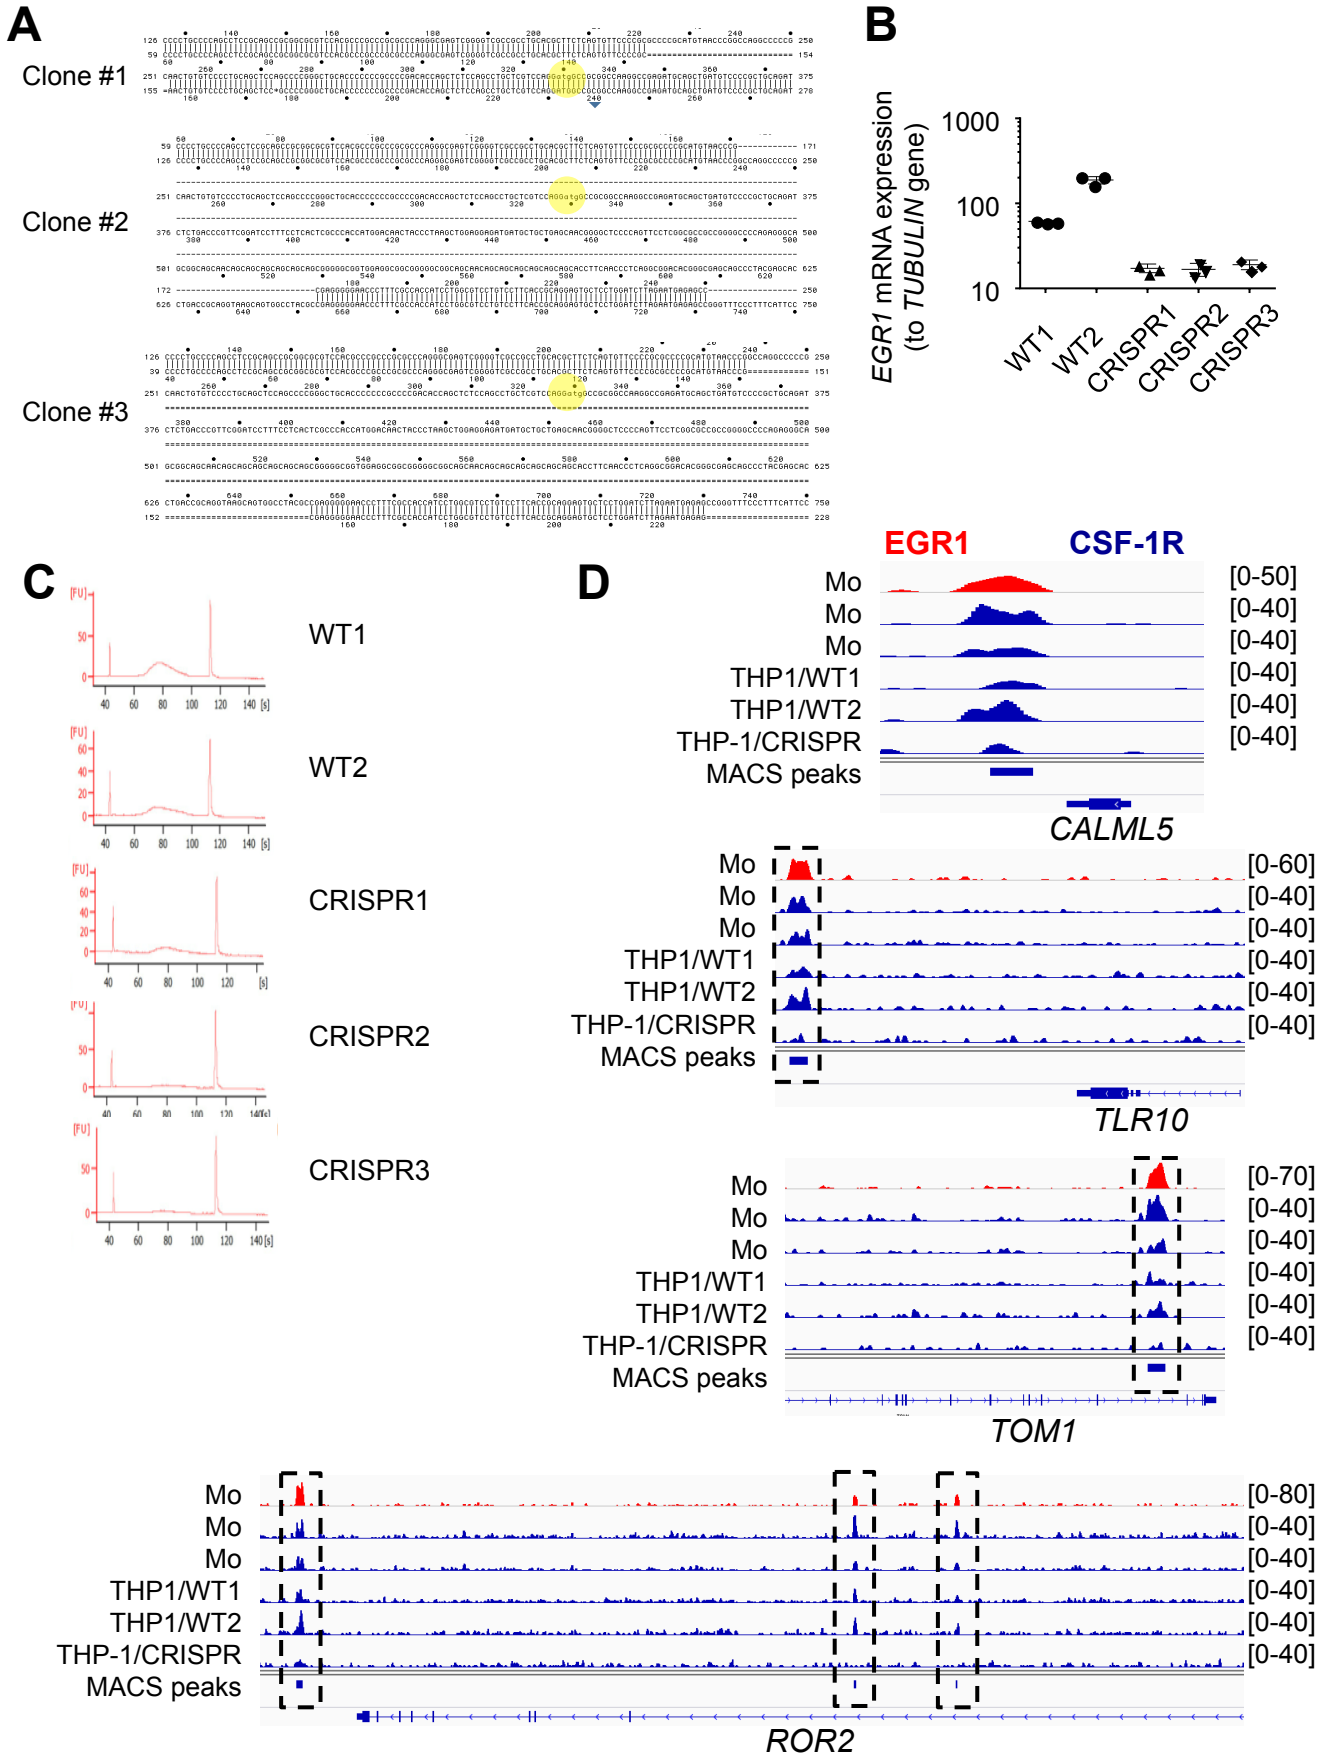



**Supplementary Figure 4: EGR1 is involved in CSF-1R recruitment on chromatin in THP-1 cells.**

**A.** Sequencing of *EGR1* exon 1 in 3 THP-1 clones showing CRISPR-Cas9 mediated deletion. Sequences aligned against wild-type *EGR1* sequence. **B.** mRNA expression (RT-qPCR) of *EGR1* gene in wild-type and *EGR1*-deleted clones (mean  $\pm$  SD of 3). **C.** Migration profile (Agilent Bioanalyzer) of Illumina libraries built using DNA immunoprecipitated with anti-CSF-1R antibody (sc-46662) in wild-type (WT) and *EGR1*-deleted clones (CRISPR). **D.** Peak calling on *CALML5*, *TLR10*, *TOM1* and *ROR2* genes for *EGR1* in one monocyte sample and CSF-1R in two monocyte samples (Mo), two wild-type (WT) THP-1 clones and the pool of 3 *EGR1*-deleted THP-1 clones (CRISPR).

Laura Bencheikh *et al*, Supplementary Figure 5

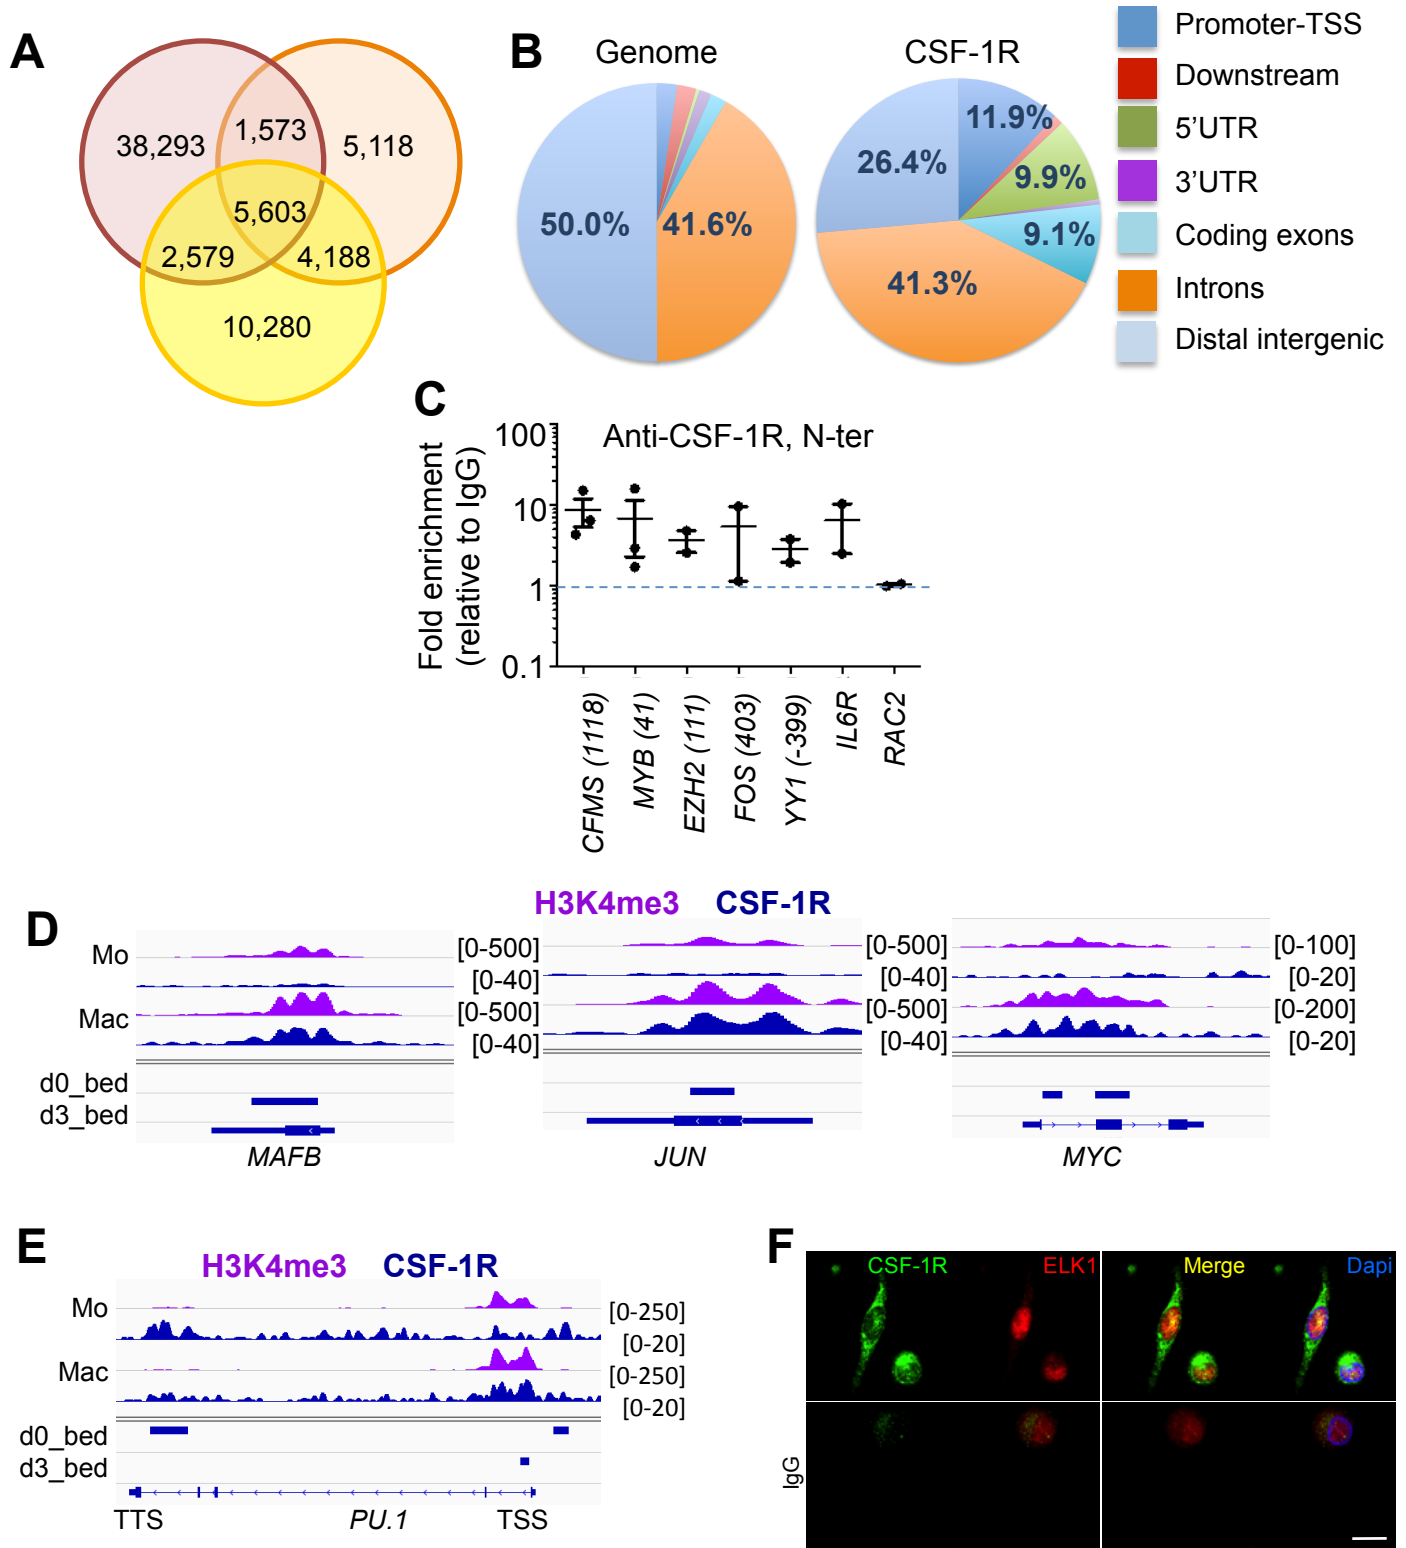

**Supplementary Figure 5: Differential CSF-1R chromatin localization in CSF-1-induced macrophages.**

**A.** Venn diagram of peak calling (input normalization) from ChIP-seq experiment (anti-CSF-1R sc-46662) performed on monocytes differentiated 3 days with 100ng/mL CSF-1 from 3 donors. **B.** Repartition of the ChIP-seq peaks common to the 3 donors on the genome compared to genome of reference (Genome). **C.** Monocytes were stimulated 3 days with 100ng/mL CSF-1. Chromatin was immunoprecipitated with CSF-1R antibody (anti-N-ter sc-46662) or control IgG followed by qPCR directed against *CFMS*, *MYB*, *EZH2*, *FOS*, *YY1* and *IL6R* genes (normalization to IgG, mean +/- SEM of 2 independent experiments). *RAC2* is a negative control whose level is figured as a hatched blue bar. **D.** Peak calling for H3K4me3 (purple) and CSF-1R (blue) on *MAFB*, *JUN*, *MYC* E. and *PU.1* genes in monocytes (Mo) compared to CSF-1 (3 days) differentiated-macrophages (Mac) (TSS : transcription starting site; TTS : transcription termination site). **F.** Monocytes were treated 3 days with 100ng/mL CSF-1, fixed and stained for CSF-1R (green), ELK1 (red) or control IgG and Dapi (blue) followed by confocal imaging (n = 2, scale : 10µm).

Laura Bencheikh *et al*, Supplementary Figure 6

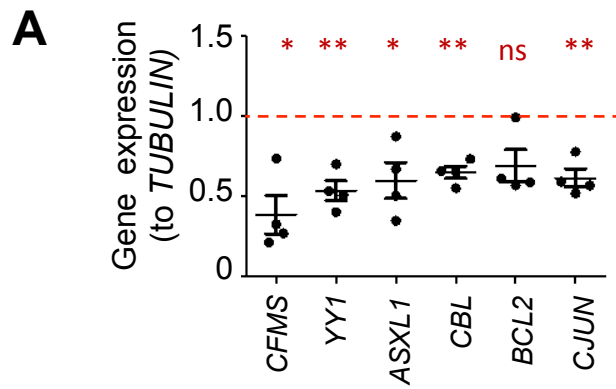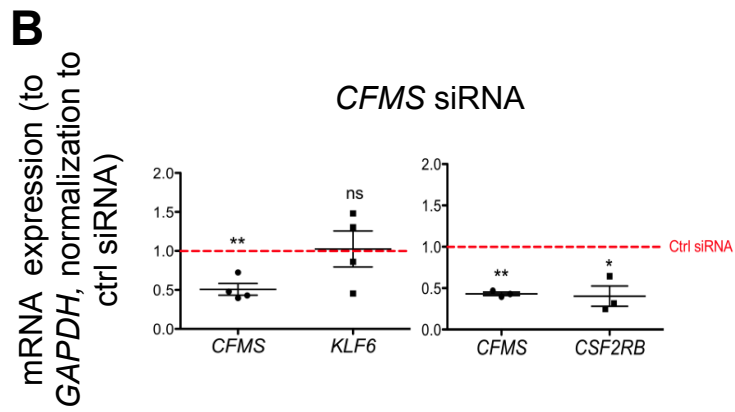

**Supplementary Figure 6: Differential gene regulation by CSF-1R in CSF-1-induced macrophages.**

Monocytes were treated with 100 ng/ml CSF-1 for 2 days and transfected during 48h with scrambled (SCR) or *CFMS*-specific siRNA **A.** RT-qPCR analysis of *CFMS*, *YY1*, *ASXL1*, *CBL*, *BCL2* and *CJUN* genes **B.** RT-qPCR analysis of *CFMS*, *KLF6* and *CSF2RB* gene expression. Results in the two panels are expressed as a mean +/- SEM of 3 to 4 independent experiments, normalization to control siRNA indicated as a red hatched line, \*p<0.05, \*\*P<0.01, ns : non significant.

Laura Bencheikh *et al*, Supplementary Figure 7

Uncropped blots related to Figure 1e

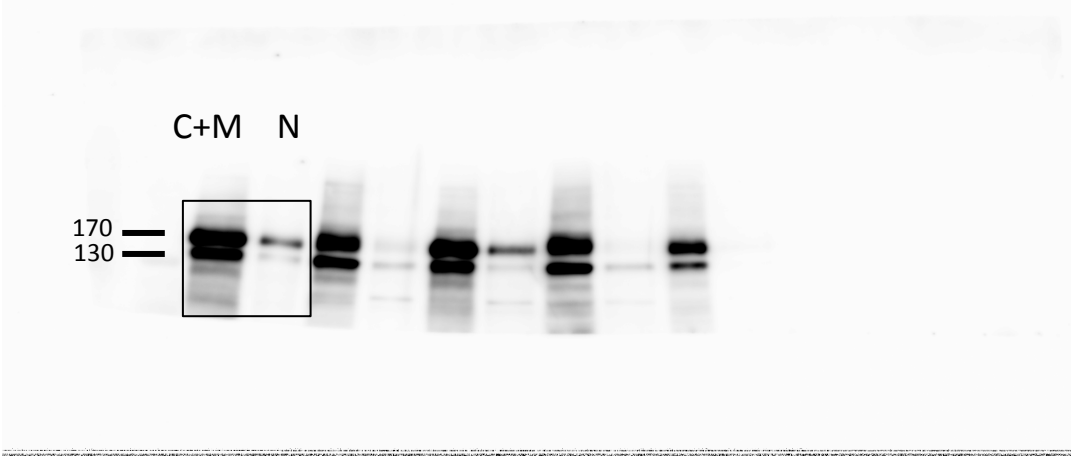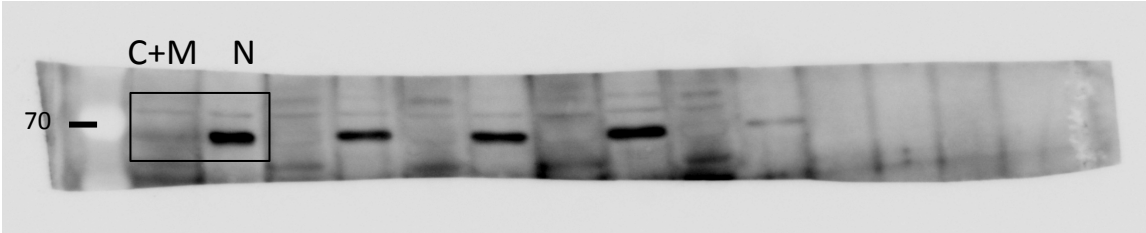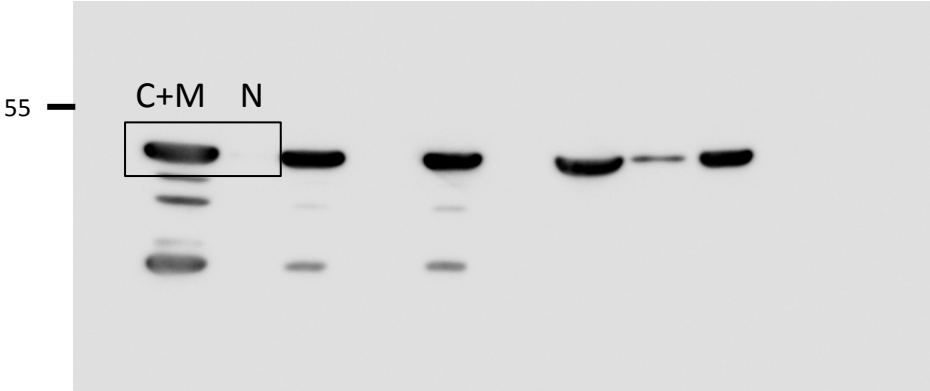

Laura Bencheikh *et al*, Supplementary Figure 7

Uncropped blots related to Figure 4e

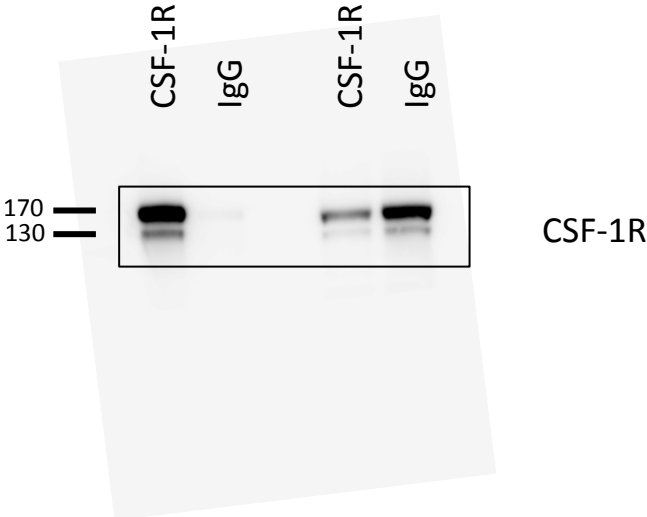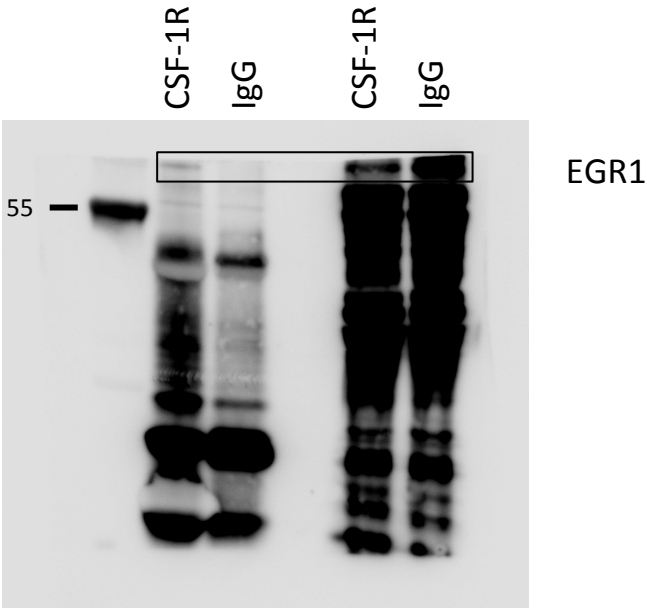

Laura Bencheikh *et al*, Supplementary Figure 7

Uncropped blots related to Figure 6a

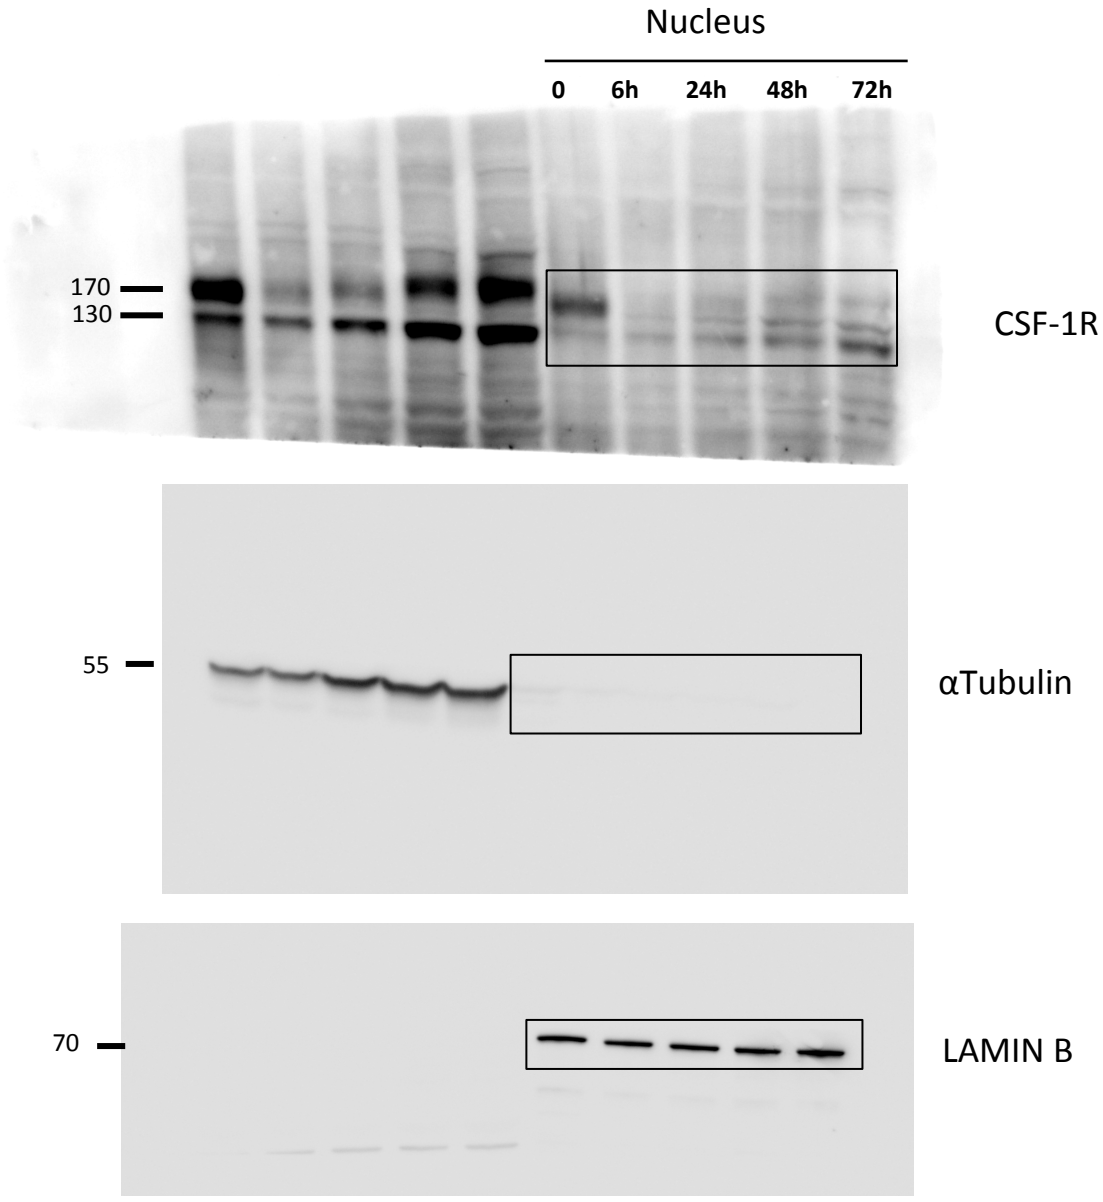



Laura Bencheikh *et al*, Supplementary Figure 7

Uncropped blots related to Figure 7d

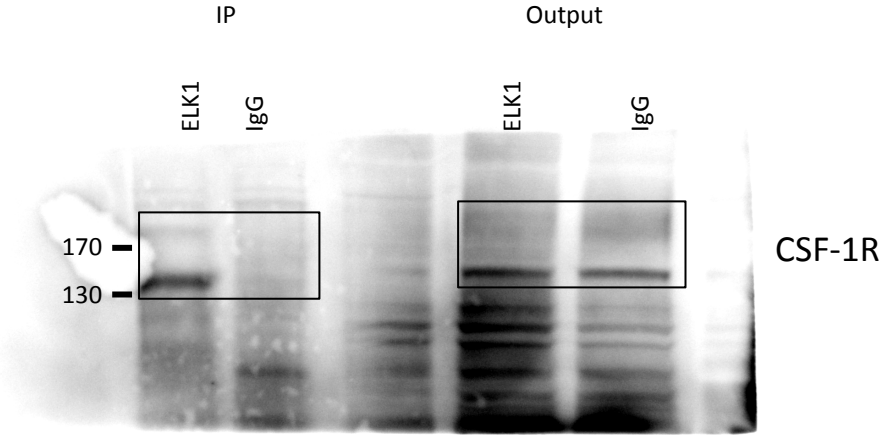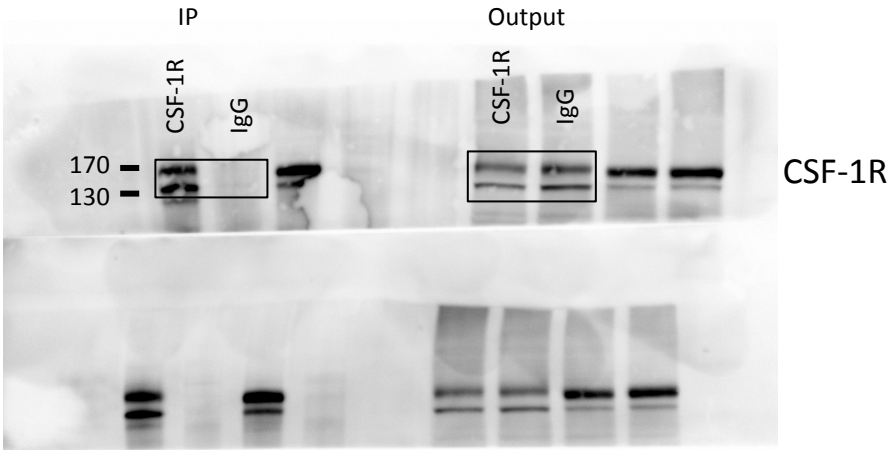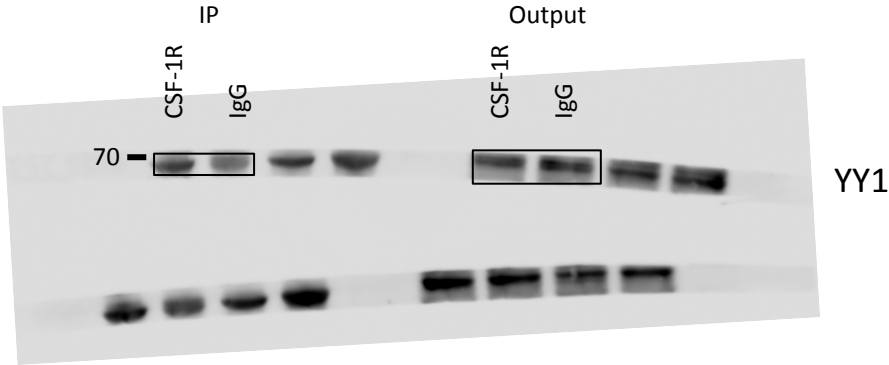

Laura Bencheikh *et al*, Supplementary Figure 7

Uncropped blots related to Figure 9a

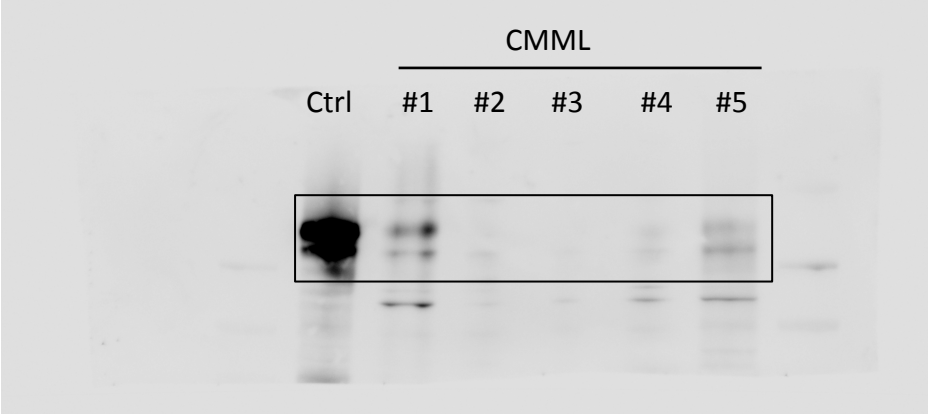

CSF-1R

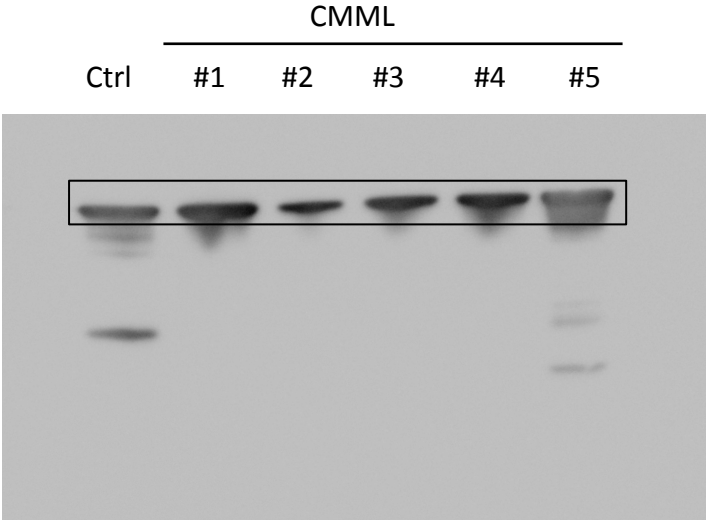

ACTIN

**Supplementary Figure 7: Uncropped scans of key immunoblots.**

## Supplementary Tables

**Supplementary Table 1:** Enrichment of Gene Ontology biological process terms in ChIP hits with CSF-1R in monocytes

| Go term ID | GO biological process                                             | Fold Enrichment | P-value   |
|------------|-------------------------------------------------------------------|-----------------|-----------|
| GO:0036179 | osteoclast maturation                                             | 10.38           | 3.48 e-7  |
| GO:0010934 | macrophage cytokine production                                    | 10.33           | 3.25 e-5  |
| GO:0050902 | leukocyte adhesive activation                                     | 10.29           | 3.32 e-3  |
| GO:2000669 | negative regulation of dendritic cell apoptotic process           | 9.96            | 2.11 e-6  |
| GO:0036035 | osteoclast development                                            | 9.13            | 6.41 e-8  |
| GO:0071674 | mononuclear cell migration                                        | 8.37            | 3.86 e-4  |
| GO:0033159 | negative regulation of protein import into nucleus, translocation | 7.12            | 2.33 e-5  |
| GO:2000510 | positive regulation of dendritic cell chemotaxis                  | 6.19            | 5.06 e-4  |
| GO:0033235 | positive regulation of protein sumoylation                        | 5.27            | 1.28 e-10 |
| GO:0061082 | myeloid leukocyte cytokine production                             | 3.74            | 1.66 e-3  |

**Supplementary Table 2:** Enrichment of Gene Ontology biological process terms in ChIP hits with CSF-1R in monocytes exposed to CSF-1 for 3 days

| Go term ID | GO biological process                                                                                 | Fold Enrichment | P-value  |
|------------|-------------------------------------------------------------------------------------------------------|-----------------|----------|
| GO:0010847 | regulation of chromatin assembly                                                                      | 12.92           | 1.76 e-3 |
| GO:0000389 | mRNA 3'-splice site recognition                                                                       | 8.67            | 1.31 e-3 |
| GO:0072369 | regulation of lipid transport by positive regulation of transcription from RNA polymerase II promoter | 8.41            | 3.79 e-4 |
| GO:0072363 | regulation of glycolysis by positive regulation of transcription from RNA polymerase II promoter      | 7.29            | 2.44 e-3 |
| GO:0046833 | positive regulation of RNA export from nucleus                                                        | 6.86            | 1.01 e-2 |
| GO:0072367 | regulation of lipid transport by regulation of transcription from RNA polymerase II promoter          | 5.66            | 2.30 e-4 |
| GO:0036179 | osteoclast maturation                                                                                 | 5.13            | 3.29 e-3 |
| GO:0036035 | osteoclast development                                                                                | 3.69            | 1.26 e-2 |
| GO:0090314 | positive regulation of protein targeting to membrane                                                  | 3.18            | 9.26 e-4 |
| GO:0008334 | histone mRNA metabolic process                                                                        | 2.47            | 5.68 e-4 |

**Supplementary Table 3:** Enrichment of Gene Ontology biological process terms in ChIP hits with CSF-1R in monocytes exposed to CSF-1 for 6 hours

| Go term ID | GO biological process                                               | Fold Enrichment | P-value  |
|------------|---------------------------------------------------------------------|-----------------|----------|
| GO:0071677 | positive regulation of mononuclear cell migration                   | 110.34          | 2.52E-06 |
| GO:0035691 | macrophage migration inhibitory factor signaling pathway            | 26.63           | 8.27E-07 |
| GO:0038145 | macrophage colony-stimulating factor signaling pathway              | 11.18           | 9.12E-04 |
| GO:0050765 | negative regulation of phagocytosis                                 | 7.41            | 4.13E-05 |
| GO:2000785 | regulation of autophagic vacuole assembly                           | 7.71            | 2.94E-04 |
| GO:0006890 | retrograde vesicle-mediated transport, Golgi to ER                  | 4.55            | 1.92E-04 |
| GO:0033235 | positive regulation of protein sumoylation                          | 3.66            | 6.74E-04 |
| GO:0002246 | wound healing involved in inflammatory response                     | 3.66            | 2.95E-02 |
| GO:0000184 | nuclear-transcribed mRNA catabolic process, nonsense-mediated decay | 2.86            | 8.78E-05 |
| GO:0019083 | viral transcription                                                 | 2.83            | 5.87E-06 |

**Supplementary Table 4:** Primer sequences used for RT-qPCR analyses

| Gene              | Forward                         | Reverse                        |
|-------------------|---------------------------------|--------------------------------|
| <i>CFMS</i>       | 5'-GCCCCCATCACCTCACT-3'         | 5'-GTGTTTTGGAAGGTAGCGTTGTT-3'  |
| <i>LUCIFERASE</i> | 5'-CAGCTGCACAAAGCCATGA-3'       | 5'-CGATATGTGCGTCGGTAAAGG-3'    |
| <i>B2M</i>        | 5'-ACACAACTGTGTTCACTAGC-3'      | 5'-CAACTTCATCCACGTTACC-3'      |
| <i>GAPDH</i>      | 5'-AAGGTCGGAGTCAACGGGT-3'       | 5'-AGAGTTAAAAGCAGCCCTGGTG-3'   |
| <i>TUBULIN A</i>  | 5'-TCCAGATTGGCAATGCCTG-3'       | 5'-GGCCATCGGGCTGGAT-3'         |
| <i>RENILLA</i>    | 5'-AATTTGCAGCATATCTTGAACCATT-3' | 5'-GGATTTACAGAGGCCATGAT-3'     |
| <i>HPRT</i>       | 5'-GGACAGGACTGAACGTCTTGC-3'     | 5'-CTTGAGCACACAGAGGGCTACA-3'   |
| <i>RPL32</i>      | 5'-TGTCCTGAATGTGGTCACCTGA-3'    | 5'-CTGCAGTCTCCTTGACACCT-3'     |
| <i>PU.1</i>       | 5'-GGAGAGCCATAGCGACCATTACT-3'   | 5'-CGGCGAAGCTCTCGAACTC-3'      |
| <i>BCL2</i>       | 5'-AACTGTACGGCCCCAGCAT-3'       | 5'-GCCAAACTGAGCAGAGTCTTCAG-3'  |
| <i>EZH2</i>       | 5'-CGTGACCATTGGGACAGTA-3'       | 5'-TTGGAGCCCCGCTGAATA-3'       |
| <i>ASXL1</i>      | 5'-CCGCGCGCCTGGTA-3'            | 5'-CTGCAGAATCTGTTTTGGTGTCAT-3' |
| <i>CBL</i>        | 5'-GAAGTGCTGGAAGCTCATGGA-3'     | 5'-CGCCAGCTTTGGGTTCTG-3'       |
| <i>CSF2RB</i>     | 5'-TACAACGACTACACCAGCCACAT-3'   | 5'-AGCCGCTGGGCATCCT-3'         |
| <i>CEBPD</i>      | 5'-GGAGATGCAGCAGAAGTTGGT-3'     | 5'-CGCGCTGGTGCAGCTT-3'         |
| <i>SRC</i>        | 5'-GGACAGCCCCTGCCTTCTA-3'       | 5'-GGCATCCTTGGGCTTGCT-3'       |
| <i>KLF6</i>       | 5'-TGCACGAGACCGGCTACTTC-3'      | 5'-TAGGCAGGTCTGTTGCCAGTAC-3'   |
| <i>YY1</i>        | 5'-GGCTGCGTCTCAGGTTTCC-3'       | 5'-CCACCGTTGGGAGGATGTC-3'      |
| <i>C3</i>         | 5'-GGGAGTCCCATGTACTCTATCATCA-3' | 5'-TGGGCCTCCAGCACCAT-3'        |
| <i>FGR</i>        | 5'-CCATCAACCCTGGCTTCTC-3'       | 5'-CACCCAATCCCTGACACA-3'       |
| <i>CJUN</i>       | 5'-AACGACCTTCTATGACGATGCC-3'    | 5'-TGTAGCCATAAGGTCCGCTCTC-3'   |
| <i>EGR1</i>       | 5'-TGATGTCCCCGCTGCAG-3'         | 5'-GTCCATGGTGGGCGAGTG-3'       |

**Supplementary Table 5:** Primer sequences used for ChIP-qPCR analyses

| Gene                   | Forward                            | Reverse                            |
|------------------------|------------------------------------|------------------------------------|
| <i>PU.1 promoter</i>   | 5'-CTCCACCCCCAGAAAAGAT-3'          | 5'-GCGCTGGGAAAACAAAAAAG-3'         |
| <i>PU.1 intron 4-1</i> | 5'-GGCTGAGACAGGAGAATTGCTT-3'       | 5'-GGCACGATCTCGGCTCACT-3'          |
| <i>PU.1 intron 4-2</i> | 5'-GGAGGTGGAGGTTGCAGTGA-3'         | 5'-GTTTTTGAGATGGAGTTGCTCTTGT-3'    |
| <i>CSF2RB intron1</i>  | 5'-GTTTGCATGGGCATCTTGAGT-3'        | 5'-CAAGTGTGGCTCCTTTTCTTCTG-3'      |
| <i>KLF6-18kb</i>       | 5'-TGTGTGCCCTCTGTGTGTATGTG-3'      | 5'-CTTACCCACACAGAGACACACAGAC-3'    |
| <i>KLF6-24kb</i>       | 5'-TCACAGACACACATGCGTACAC-3'       | 5'-GTCTCTCTGTGTGTCTGCTGCATA-3'     |
| <i>C3 intron 4</i>     | 5'-TCCGTGGATTCTGCTTTCAGT-3'        | 5'-CGTCATGATCCCGATATTCAGAT-3'      |
| <i>FGR intron 2</i>    | 5'-AGGCAAATCACCCATACTTAGAG-3'      | 5'-GTCCTATTGCTTTGATATGTTGTGTTTC-3' |
| <i>CMKLR1</i>          | 5'-CTACCACAGAATTAGCAAAAGAGTAGCT-3' | 5'-CGCCTAGCCATCCATCCA-3'           |
| <i>CEBPD</i>           | 5'-CCCAGAGGATTCAGACTGG-3'          | 5'-ACACACTAGGAGGTTTATTGC-3'        |
| <i>SRC</i>             | 5'-GACTCTGCTCATGCCACGTATTT-3'      | 5'-GCCAGAAGAAGTGGGAGAAGAC-3'       |
| <i>CFMS intron 1</i>   | 5'-CCCCAACACCTGCAATTGA-3'          | 5'-CCTGAGCAAGCCTCTGATACTCTT-3'     |
| <i>MYB TSS</i>         | 5'-GCCGCTCCAGAGACTGATG-3'          | 5'-CCCAACGTCGGATACATTT-3'          |
| <i>EZH2 TSS</i>        | 5'-GGAGACACAGTCCGTCCTTTG-3'        | 5'-ACGGGACAGACACAAGTTGGT-3'        |
| <i>FOS intron 1</i>    | 5'-GGGATAGCCTCTTACTACCACTCA-3'     | 5'-ACAGGCGAGCCCATGCT-3'            |
| <i>YY1 TSS</i>         | 5'-GGCTGCGTCTCAGGTTTCC-3'          | 5'-CCACCGTTGGGAGGATGTC-3'          |
| <i>ILR6 intron1</i>    | 5'-CATGGTAGCATGTACTGTAGTCTCA-3'    | 5'-TGGTTCACTGCAACTTCTAATTCC-3'     |
| <i>RAC2</i>            | 5'-ATCTCAGGGCATCCAGTTG-3'          | 5'-GGTGGGAGATGGGTAGGTACCT-3'       |

**Supplementary Table 6**

| <b>CMML patient characteristics</b>     | <b>N = 28</b>    |
|-----------------------------------------|------------------|
| Mean age in years (range)               | 80.3 (60-96)     |
| Sex ratio M/F                           | 15/13            |
| CMML 0/CMML 1/CMML 2 (WHO criteria)     | 10/14/3          |
| Proliferative/dysplastic (WHO criteria) | 14/14            |
| Leucocyte mean. $10^9$ /L (range)       | 27.3 (2.1-167.4) |
| Monocyte mean. $10^9$ /L (range)        | 8.1 (1.0-110.0)  |
| Platelet count mean. $10^9$ /L (range)  | 146 (23-597)     |
| Hemoglobin level mean g/dL (range)      | 11.5 (7.7-15.9)  |
| Karyotype (normal/abnormal/not done)    | 24/3/1           |
| <b>Mutations (mutated/done)</b>         |                  |
| <i>TET2</i>                             | 20/27 (74%)      |
| <i>SRSF2</i>                            | 11/24 (46%)      |
| <i>ASXL1</i>                            | 10/24 (42%)      |
| <i>RUNX1</i>                            | 3/24 (12.5%)     |
| <i>NRAS</i>                             | 2/22 (9%)        |
| <i>KRAS</i>                             | 2/25 (8%)        |
| <i>CBL</i>                              | 2/25 (8%)        |
