# Supplementary material for: Dynamic gene regulation by nuclear colony-stimulating factor 1 receptor in human monocytes and macrophages
Source: PubMed Central journal article supplement (PMC6486619; doi:10.1038/s41467-019-09970-9), 2019-04-26
Supplement: 41467_2019_9970_MOESM3_ESM.pdf [file 41467_2019_9970_MOESM3_ESM.pdf]

## Description of Additional Supplementary Files

**File Name:** Supplementary Data 1

**Description:** List of 4,980 common CSF-1R broad peaks identified using MACS2 algorithm in monocytes sorted from three healthy donors.

**File Name:** Supplementary Data 2

**Description:** Intersection with Irreproducible Discovery Rate (IDR) analysis identified a set of 2,303 common peaks.

**File Name:** Supplementary Data 3

**Description:** List of 3,542 EGR1 common peaks identified using MACS2 algorithm in monocytes sorted from two healthy donors.

**File Name:** Supplementary Data 4

**Description:** List of 2,014 EGR1 and CSF-1R common peaks identified using MACS2 algorithm in monocytes sorted from healthy donors.

**File Name:** Supplementary Data 5

**Description:** List of 1,575 EGR1, CSF-1R and H3K4me1 common peaks identified using MACS2 algorithm in monocytes sorted from healthy donors.

**File Name:** Supplementary Data 6

**Description:** List of 5,603 common CSF-1R broad peaks identified using MACS2 algorithm in CSF-1-differentiated macrophages from three healthy donors.

**File Name:** Supplementary Data 7

**Description:** List of 1,192 common CSF-1R broad peaks identified using MACS2 algorithm in monocytes and macrophages.

**File Name:** Supplementary Data 8

**Description:** List of 2,975 common CSF-1R and H3K4me1 peaks identified using MACS2 algorithm in monocytes.

**File Name:** Supplementary Data 9

**Description:** List of 1,605 common CSF-1R and H3K4me3 peaks identified using MACS2 algorithm in monocytes.

**File Name:** Supplementary Data 10

**Description:** List of 1,925 common CSF-1R and H3K4me1 peaks identified using MACS2 algorithm in macrophages.

**File Name:** Supplementary Data 11

**Description:** List of 4,896 common CSF-1R and H3K4me3 peaks identified using MACS2 algorithm in macrophages.

**File Name:** Supplementary Data 12

**Description:** List of 2,388 CSF-1R peaks identified using MACS2 algorithm in monocytes after 6 hours of CSF-1 exposure.

**File Name:** Supplementary Data 13

**Description:** List of 2,157 common CSF-1R and H3K4me3 peaks identified using MACS2 algorithm in monocytes after 6 hours of CSF-1 exposure.

**File Name:** Supplementary Data 14

**Description:** List of 680 common CSF-1R peaks identified using MACS2 algorithm in monocytes at day0 and after 6 hours of CSF-1 exposure.

**File Name:** Supplementary Data 15

**Description:** Bed file of all common CSF-1R broad peaks identified using MACS2 algorithm in monocytes sorted from three healthy donors.

**File Name:** Supplementary Data 16

**Description:** Bed file of all common CSF-1R broad peaks identified using MACS2 algorithm in macrophages generated from three healthy donors.

**File Name:** Supplementary Movie 1

**Description:** Nuclear localization of CSF-1R holoreceptor is driven by its ligand. Monocytes were differentiated into macrophages with 100ng/mL CSF-1 for 3 days, adherent cells were serumdeprived, their nuclei were stained with Hoechst (blue) and the cells were stimulated 15 min with fluorescent CSF-1 (green) before wash and living cell observation with a spinning microscope (one image every minute).
